# Supplementary material
Source: Springer Nature journal article supplement (https://www.springermedizin.de/resource/supplementary/12936_2011_1855_MOESM2_ESM.pdf/9541932)

Intervention Variation

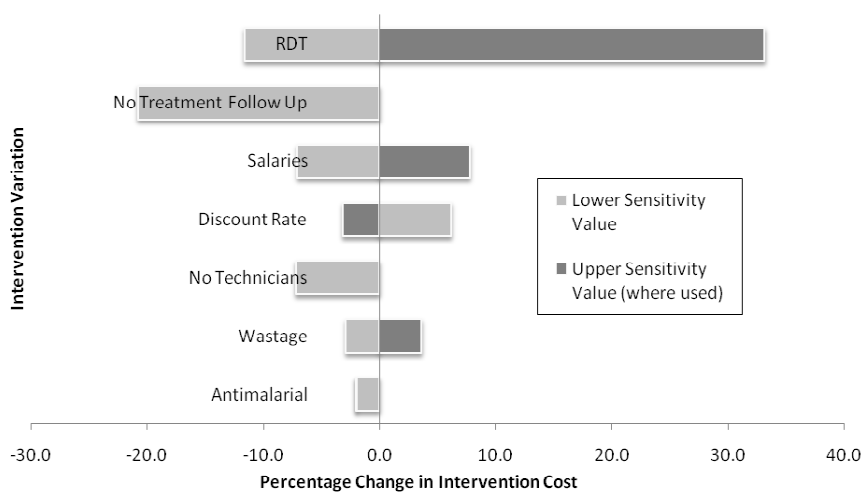

Supplement: MOESM2 [file 9541932]
